# Supplementary material for: Unsupervised structure classesvs.supervised property classes of silicon quantum dots using neural networks
Source: Royal Society of Chemistry journal article supplement (doi:10.1039/d0nh00637h), 2021-01-01
Supplement: d0nh00637h1.pdf [file d0nh00637h1.pdf]

# SUPPORTING INFORMATION

## Unsupervised Structure Classes *vs* Supervised Property Classes of Silicon Quantum Dots using Neural Networks

Amanda J. Parker<sup>1</sup> and Amanda S. Barnard\*<sup>2</sup>

<sup>1</sup>*Data61 CSIRO, Docklands 3008, Australia*

<sup>2</sup>*Research School of Computer Science, Australian National University, Acton 2601, Australia*

The document contains further information and results to support the conclusions in the main text, including the correlations matrix and skew map in Fig. S1. The distribution of the supervised property classes (color bands) with respect to each of the structural features is shown in Fig. S2, and the distribution of the unsupervised property classes (ILS clusters) with respect to each of the structural features is shown in Fig. S3. The weights and biases for the neural network classifier for the unsupervised structure classes are provided, along with the neural network regressor, which can be used to construct an analytical expression for classifying surface passivated SiQDs based on the the size and shape. The weights and biases for the neural network classifier for the supervised property classes are also provided, along with results using a random forest classifier in Fig. S4. A flow chart of the entire workflow is shown in Fig. S5.

---

\*Corresponding author: amanda.s.barnard@anu.edu.au

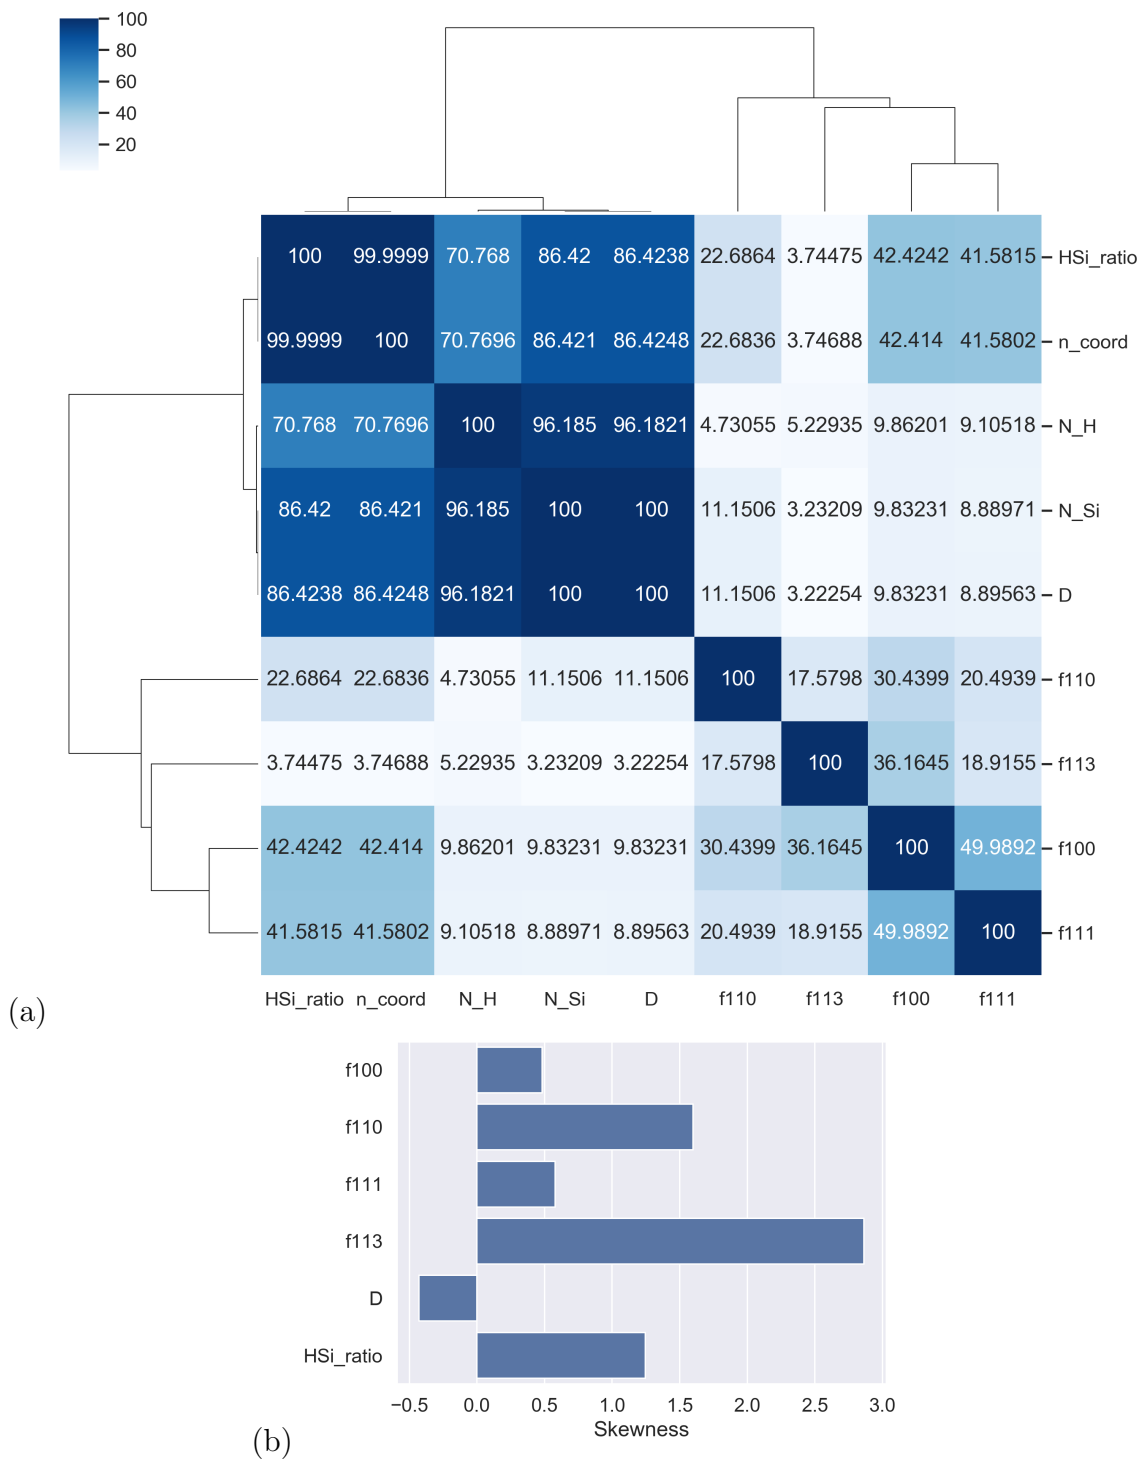

Figure S1: (a) The correlation matrix for the entire SiQD data set, and (b) the skew maps of the retained features.

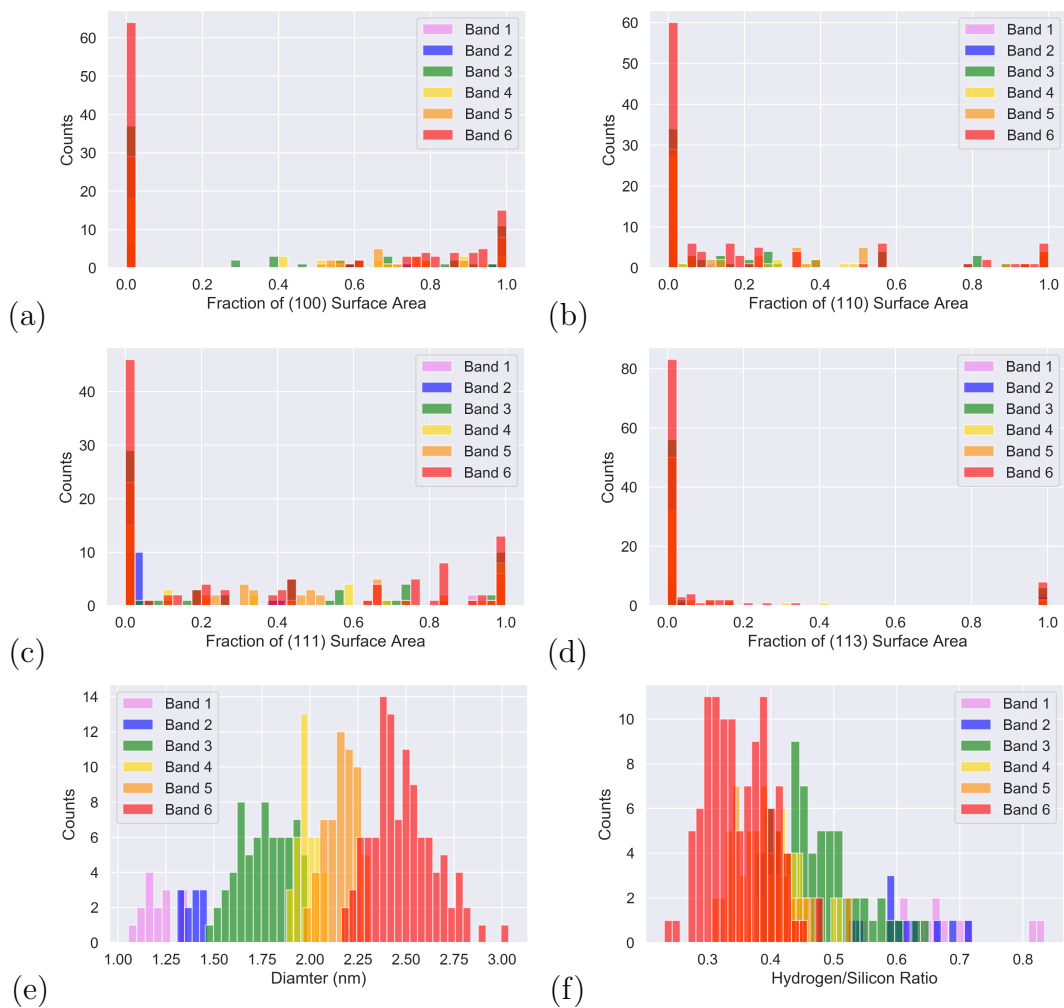

Figure S2: Distribution of the supervised property classes with respect to (a) the fraction of {100} surface area, (b) the fraction of {110} surface area, (c) the fraction of {111} surface area, (d) the fraction of {113} surface area, (e) the average particle diameter (in nm) and , (f) the hydrogen to silicon ratio.

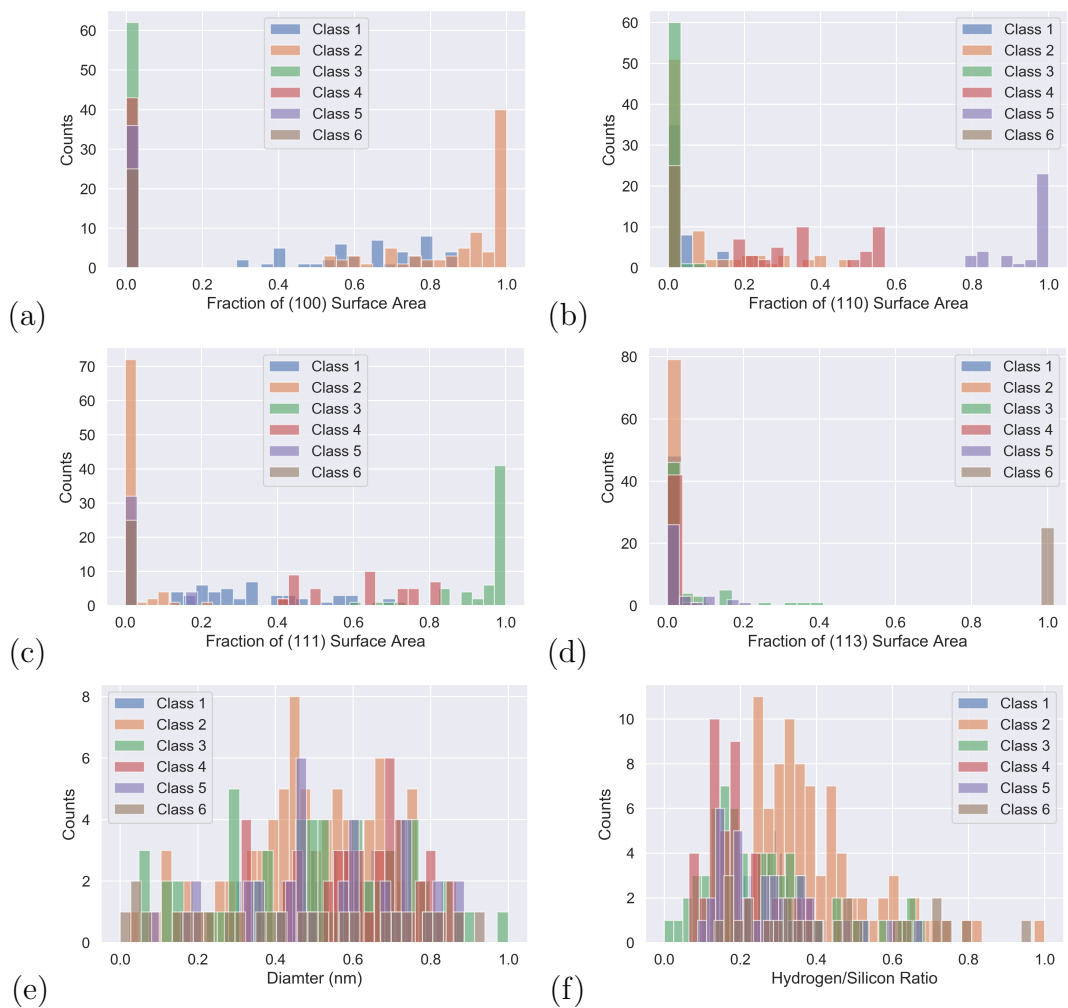

Figure S3: Distribution of the unsupervised structure classes with respect to (a) the fraction of  $\{100\}$  surface area, (b) the fraction of  $\{110\}$  surface area, (c) the fraction of  $\{111\}$  surface area, (d) the fraction of  $\{113\}$  surface area, (e) the average particle diameter (in nm), and (f) the hydrogen to silicon ratio.

# Neural Network Weights and Biases

## Unsupervised Structure Classes

The weights and biases for the one hidden layer and the output layer for unsupervised structure classes, and the output layer for each class. Format: hidden layer, neuron [ $w_i \dots w_I$ ], Bias

```
Hidden 0, 0 [-0.982 -2.759 1.334 2.218 -0.149 -2.265],+8.776
Hidden 0, 1 [ 4.201 -2.75 -1.066 0.061 -1.533 1.062],+4.215
Hidden 0, 2 [ 0.016 -0.031 -0.034 -0.022 -0.005 -0.015],-0.465
Hidden 0, 3 [-0.383 2.302 -0.016 -1.901 0.394 1.302],+12.329
```

```
Hidden 1, 0 [1.844 0.12 0.039 0.343],-0.695
Hidden 1, 1 [-2.811 -4.003 0.026 3.077],+10.043
Hidden 1, 2 [-3.098 3.65 -0.016 1.459],-2.526
```

```
Output, 0 [ 0.532 -1.994 -0.22 ],+30.405
Output, 1 [-1.132 0.214 4.51 ],-34.424
Output, 2 [ 0.806 -0.486 -1.271],+16.349
Output, 3 [ 0.162 1.969 -1.19 ],-8.65
Output, 4 [-1.005 3.78 -0.598],-43.116
Output, 5 [ 0.653 -3.381 -1.307], +38.491
```

## Supervised Property Classes

The weights and biases for the three hidden layers and the output layer for supervised property classes, and the output layer for each class. Format: hidden layer, neuron [ $w_i \dots w_I$ ], Bias

```
Hidden 0, 0 [-0.949 0.385 0.305 0.38 -1.139 -0.968],+8.650
Hidden 0, 1 [-0.016 0.008 -0.004 0.006 -0.416 -0.332],-2.091
Hidden 0, 2 [-0.05 0.121 0.051 0.084 -1.488 -1.122],+7.004
Hidden 0, 3 [-0.009 -0.09 -0.029 -0.088 1.957 1.45 ],-5.279
Hidden 0, 4 [-0.13 0.086 0.046 0.063 -0.733 -0.581],+1.139
Hidden 0, 5 [ 0.627 -0.141 -0.208 -0.188 -1.005 -0.761],-5.025
Hidden 0, 6 [-0.294 0.005 0.065 0.038 1.709 1.258],-2.874
Hidden 0, 7 [ 0.858 -0.269 -0.264 -0.279 -0.702 -0.451],-5.937
Hidden 0, 8 [-0.132 0.048 0.009 0.058 -0.842 -0.674],-4.360
Hidden 0, 9 [-0.462 0.169 0.172 0.169 -0.339 -0.259],+6.246
```

```
Hidden 1, 0 [ 0.422 0.009 -0.049 0.104 0.048 -0.33 0.225 -0.453 0.044 0.201],+3.246
Hidden 1, 1 [-0.651 -0.201 -0.495 0.666 -0.297 -0.206 0.485 -0.037 -0.433 -0.219],-3.856
```

Hidden 1, 2 [-1.258 -0.358 -1.373 1.755 -0.686 -0.763 1.48 -0.412 -0.742 -0.412],-2.996  
 Hidden 1, 3 [-0.802 -0.272 -1.023 1.312 -0.501 -0.67 1.148 -0.437 -0.546 -0.239],-1.729  
 Hidden 1, 4 [ 0.335 -0.008 -0.279 0.342 -0.022 -0.449 0.458 -0.55 0.06 0.151],+4.802  
 Hidden 1, 5 [-0.598 -0.079 -0.306 0.366 -0.185 0.077 0.199 0.219 -0.193 -0.251],-2.077  
 Hidden 1, 6 [-0.132 -0.117 -0.643 0.863 -0.251 -0.617 0.862 -0.602 -0.219 -0.008],+2.924

Hidden 2, 0 [-0.405 -0.507 -1.435 -1.167 -0.575 -0.063 -0.976],-4.655  
 Hidden 2, 1 [0.336 0.763 2.303 1.799 0.701 0.304 1.312],-3.782  
 Hidden 2, 2 [ 0.562 -0.903 -1.878 -1.214 0.371 -0.856 -0.296],+1.156

Output, Band 1 [ 1.778 -1.994 0.801],-6.929  
 Output, Band 2 [ 0.522 -1.248 0.82 ],1.258  
 Output, Band 3 [-0.222 -0.604 0.676],+6.703  
 Output, Band 4 [-0.279 0.591 0.315],+3.092  
 Output, Band 5 [-0.554 1.57 -0.401],-3.268  
 Output, Band 6 [-1.239 1.687 -2.217],+1.832

## Supervised Regression

The weights and biases for the three hidden layers and the output layer for supervised property classes, and the output layer for each class. Format: hidden layer, neuron [ $w_i \dots w_I$ ],Bias

Hidden 0, 0 [-0.107 -0.41 0.096 -0.176 -0.606 0.184],-0.422  
 Hidden 0, 1 [ 0.449 0.469 -0.1 -0.208 1.031 1.08 ],+0.324  
 Hidden 0, 2 [ 0.864 0.774 0.08 -0.458 -1.551 1.773],+1.916  
 Hidden 0, 3 [0.457 0.249 0.186 0.453 2.933 3.991],+1.967  
 Hidden 0, 4 [ 0.712 -1.385 -0.179 1.198 -1.212 1.085],+0.440  
 Hidden 0, 5 [-0.128 -0.041 0.313 0.407 1.489 2.53 ],+1.147  
 Hidden 0, 6 [-0.378 -0.167 -0.257 -0.167 -0.161 -0.352],-0.440  
 Hidden 0, 7 [ 0.669 0.454 0.465 -0.642 1.8 1.325],+1.860  
 Hidden 0, 8 [ 0.086 -0.058 0.079 0.158 0.04 -0.389],-0.521  
 Hidden 0, 9 [ 0.035 0.043 0.792 0.683 -2.126 1.376],+3.030

Hidden 1, 0 [ 0.258 0.299 0.257 -0.365 -0.16 -0.166 0.367 0.202 0.257 -0.069],-0.637  
 Hidden 1, 1 [-0.269 0.889 -2.903 4.75 -2.289 2.876 -0.026 1.531 -0.006 -3.28 ],+5.021  
 Hidden 1, 2 [-0.469 -0.135 -0.15 -2. -0.18 -1.085 -0.361 -0.793 0.022 -0.381],-3.131

Output, 0 [ 0.015 7.314 -0.022],+4.578

| <b>Class</b> | <b>Precision</b> | <b>Recall</b> | <b>F1-score</b> | <b>SiQDs</b> |
|--------------|------------------|---------------|-----------------|--------------|
| Band 1       | 0.50             | 0.67          | 0.57            | 15           |
| Band 2       | 0.00             | 0.00          | 0.00            | 11           |
| Band 3       | 0.60             | 0.82          | 0.69            | 67           |
| Band 4       | 0.50             | 0.33          | 0.40            | 38           |
| Band 5       | 0.90             | 1.00          | 0.95            | 58           |
| Band 6       | 1.00             | 1.00          | 1.00            | 108          |

Table S1: Classification reports for the supervised property classes separated using the optimized Random Forest classifier.

## Supervised Property Classes with the Random Forest Classification

The supervised property classes were separated using Random Forest classifier with the optimized hyper-parameters: {criterion = ‘entropy’, max\_depth=13, min\_samples\_leaf=6, min\_samples\_split=10, min\_weight\_fraction\_leaf = 0.0336, max\_features=None, n\_estimators=493, random\_state=42}. Using these hyper-parameters the training score for the supervised classes was  $R_{train}^2 = 0.924$ , the testing score was  $R_{test}^2 = 0.817$  and the cross validation score based on 10-fold cross validation was  $R_{CV}^2 = 0.8 \pm 0.148$ .

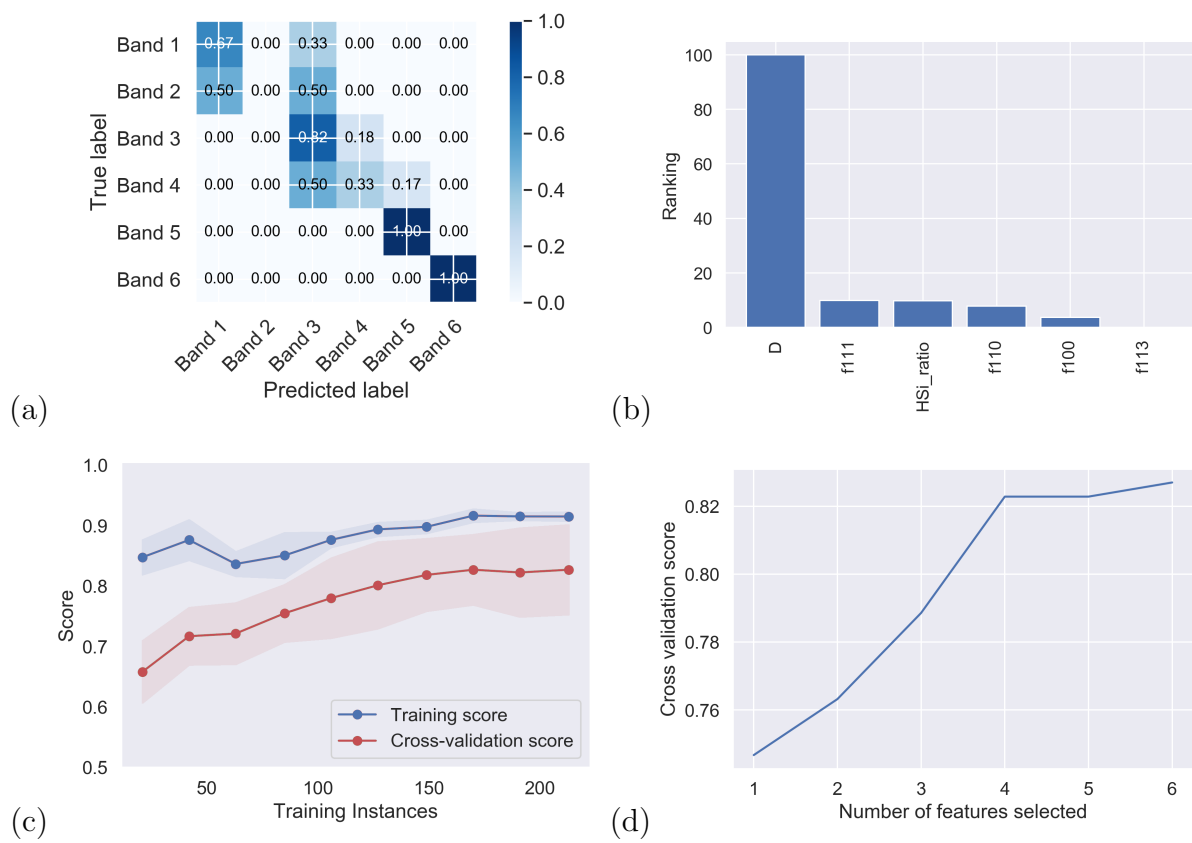

Figure S4: (a) Confusion matrix for the supervised property classes separated using the Random Forest classifier, (b) the feature importance profile, (c) the learning curve showing the overall accuracy and generalizability, and (d) the recursive feature elimination plot showing even the (unimportant) {113} facets are necessary to the model.



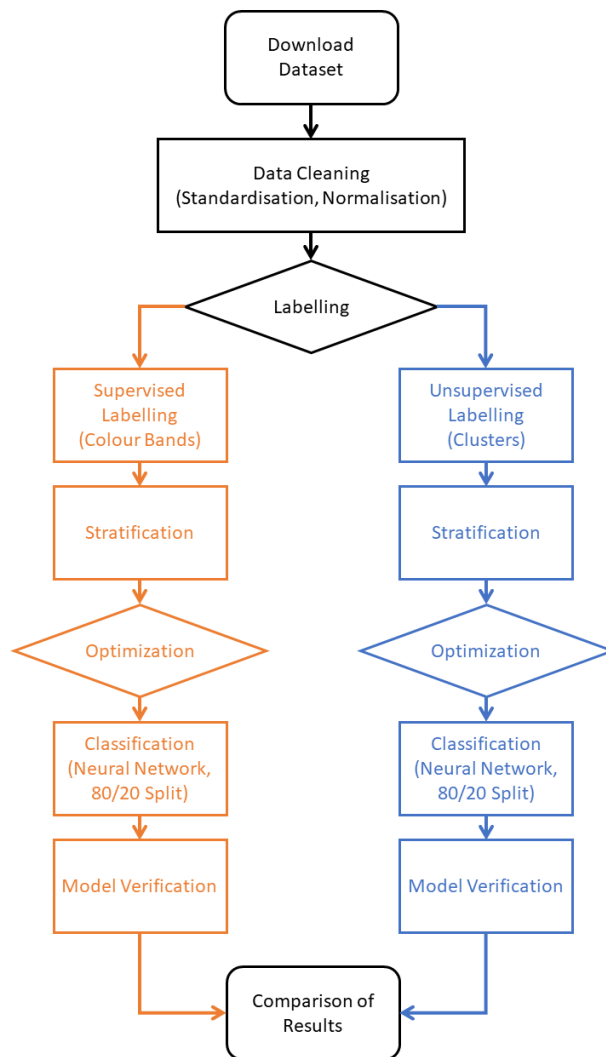

Figure S5: A flow chart of the workflow used in this study. Machine learning and data science packages were used from scikit-learn.
